# Supplementary material for: In-Situ Sludge Reduction in Membrane-Controlled Anoxic-Oxic-Anoxic Bioreactor: Performance and Mechanism
Source: MDPI journal article supplement (doi:10.3390/membranes12070659), 2022-06-27
Supplement: s1 [file s1]

## Supplementary Information

### ***In-situ* sludge reduction in membrane-controlled anoxic-oxic-anoxic bioreactor: Performance and mechanism**

Chengyue Li <sup>a,b,c,1</sup>, Tahir Maqbool <sup>a,b,c,1</sup>, Hongyu Kang <sup>a,b,c</sup> and Zhenghua Zhang <sup>a,b,c,\*</sup>

<sup>a</sup>Institute of Environmental Engineering & Nano-Technology, Tsinghua Shenzhen International Graduate School, Tsinghua University, Shenzhen 518055, Guangdong, China

<sup>b</sup>Guangdong Provincial Engineering Research Centre for Urban Water Recycling and Environmental Safety, Tsinghua Shenzhen International Graduate School, Tsinghua University, Shenzhen, 518055, Guangdong, China

<sup>c</sup>School of Environment, Tsinghua University, Beijing 100084, China

#### **Membranes**

Submitted on June 2022

<sup>1</sup>Co-first authors

\*Corresponding author: [zhenghua.zhang@sz.tsinghua.edu.cn](mailto:zhenghua.zhang@sz.tsinghua.edu.cn) (Z. Zhang)

**Table S1.** Chemical composition of synthetic wastewater.

| Components                           | Concentration (mg/L)                |
|--------------------------------------|-------------------------------------|
| Glucose                              | 1000                                |
| NH <sub>4</sub> Cl                   | 140                                 |
| KH <sub>2</sub> PO <sub>4</sub>      | 25                                  |
| NaNO <sub>3</sub>                    | 40                                  |
| MgSO <sub>4</sub> ·7H <sub>2</sub> O | 5                                   |
| FeCl <sub>3</sub>                    | 2.33                                |
| NaHCO <sub>3</sub>                   | Appropriate to maintain<br>pH = 7.0 |

**Table S2.** The average  $\pm$  standard deviation of basic quality parameters of effluent in three different bioreactors (n=25).

| Items      | Influent (mg/L)   | Effluent (mg/L)        |                   |                   | Removal (%)            |                   |                   |
|------------|-------------------|------------------------|-------------------|-------------------|------------------------|-------------------|-------------------|
|            |                   | MBR <sub>control</sub> | AOA <sub>90</sub> | AOA <sub>80</sub> | MBR <sub>control</sub> | AOA <sub>90</sub> | AOA <sub>80</sub> |
| <b>DOC</b> | 399.44 $\pm$ 2.36 | 2.32 $\pm$ 0.81        | 3.38 $\pm$ 1.21   | 3.14 $\pm$ 1.71   | >99.00                 | >99.00            | >99.00            |
| <b>TP</b>  | 6.08 $\pm$ 0.17   | 0.07 $\pm$ 0.14        | 0.62 $\pm$ 0.46   | 0.65 $\pm$ 0.25   | 98.72 $\pm$ 2.25       | 89.82 $\pm$ 7.51  | 89.28 $\pm$ 4.16  |
| <b>TN</b>  | 40.05 $\pm$ 0.35  | 2.43 $\pm$ 1.76        | 2.19 $\pm$ 1.23   | 1.77 $\pm$ 1.55   | 93.93 $\pm$ 4.40       | 94.52 $\pm$ 3.08  | 95.58 $\pm$ 3.87  |

**Table S3.** The average of  $\text{NH}_4^+$  and  $\text{NO}_3^-$  in the supernatant of different treatment units of MBRs (n=14).

| Items                     | MBR <sub>control</sub> |           |           | AOA <sub>90</sub> |           |           | AOA <sub>80</sub> |           |           |
|---------------------------|------------------------|-----------|-----------|-------------------|-----------|-----------|-------------------|-----------|-----------|
|                           | Anoxic                 | Oxic      | M-tank    | Anoxic            | Oxic      | M-tank    | Anoxic            | Oxic      | M-tank    |
| $\text{NH}_4^+$<br>(mg/L) | 1.73±1.52              | 0.24±0.36 | 0.14±0.23 | 6.71±2.18         | 0.47±0.63 | 0.93±1.33 | 3.23±2.87         | 0.25±0.31 | 1.12±1.36 |
| $\text{NO}_3^-$<br>(mg/L) | 0.18±0.32              | 1.62±1.43 | 1.60±1.57 | 0.14±0.16         | 1.05±0.77 | 0.20±0.61 | 0.21±0.21         | 1.57±1.08 | 0.62±0.75 |

**Table S4.** Sequencing of bacterial 16S rRNA gene along with alpha diversity of microbial taxa in three bioreactors.

| Sample description            | Sequencing results |      | Species richness | Species diversity |         |
|-------------------------------|--------------------|------|------------------|-------------------|---------|
|                               | Effective tags     | OTUs | Chao-1           | Shannon           | Simpson |
| MBR <sub>control</sub> -A-0d  | 49148              | 1700 | 1700.3           | 6.78              | 0.033   |
| MBR <sub>control</sub> -O-0d  | 50916              | 1664 | 1664.5           | 6.65              | 0.0525  |
| MBR <sub>control</sub> -M-0d  | 50945              | 1652 | 1652.3           | 6.16              | 0.0837  |
| AOA <sub>90</sub> -A-0d       | 49437              | 1378 | 1378.4           | 6.38              | 0.0428  |
| AOA <sub>90</sub> -O-0d       | 53188              | 1285 | 1285.5           | 6.32              | 0.0428  |
| AOA <sub>90</sub> -M-0d       | 51434              | 1260 | 1260.5           | 5.82              | 0.0811  |
| AOA <sub>80</sub> -A-0d       | 47001              | 1803 | 1803.3           | 7.22              | 0.0289  |
| AOA <sub>80</sub> -O-0d       | 48234              | 1733 | 1733.3           | 7.3               | 0.0191  |
| AOA <sub>80</sub> -M-0d       | 45035              | 1745 | 1745.2           | 7.25              | 0.0246  |
| MBR <sub>control</sub> -A-45d | 67700              | 1068 | 1068.5           | 6.18              | 0.072   |
| MBR <sub>control</sub> -O-45d | 58027              | 984  | 984.6            | 5.78              | 0.102   |
| MBR <sub>control</sub> -M-45d | 51426              | 1202 | 1202.2           | 5.56              | 0.133   |
| AOA <sub>90</sub> -A-45d      | 76204              | 1099 | 1099.2           | 6.67              | 0.0456  |
| AOA <sub>90</sub> -O-45d      | 67258              | 1155 | 1155.5           | 6.71              | 0.0439  |
| AOA <sub>90</sub> -M-45d      | 57062              | 1463 | 1463.1           | 7.13              | 0.0246  |
| AOA <sub>80</sub> -A-45d      | 65916              | 884  | 884.3            | 6.04              | 0.0639  |
| AOA <sub>80</sub> -O-45d      | 56788              | 1212 | 1212.1           | 5.83              | 0.0838  |
| AOA <sub>80</sub> -M-45d      | 56793              | 1115 | 1115.2           | 5.75              | 0.0695  |
| MBR <sub>control</sub> -A-90d | 62360              | 988  | 988.9            | 5.26              | 0.129   |
| MBR <sub>control</sub> -O-90d | 63004              | 959  | 959.7            | 6.14              | 0.0477  |
| MBR <sub>control</sub> -M-90d | 47573              | 1088 | 1088.3           | 5.99              | 0.0606  |
| AOA <sub>90</sub> -A-90d      | 51723              | 952  | 953              | 5.74              | 0.0745  |
| AOA <sub>90</sub> -O-90d      | 66099              | 885  | 886.1            | 5.38              | 0.0602  |
| AOA <sub>90</sub> -M-90d      | 46637              | 1063 | 1063.2           | 5.78              | 0.0672  |
| AOA <sub>80</sub> -A-90d      | 54424              | 945  | 945.9            | 5.17              | 0.0961  |
| AOA <sub>80</sub> -O-90d      | 58247              | 971  | 972              | 5.3               | 0.117   |
| AOA <sub>80</sub> -M-90d      | 59330              | 756  | 756.7            | 3.91              | 0.213   |

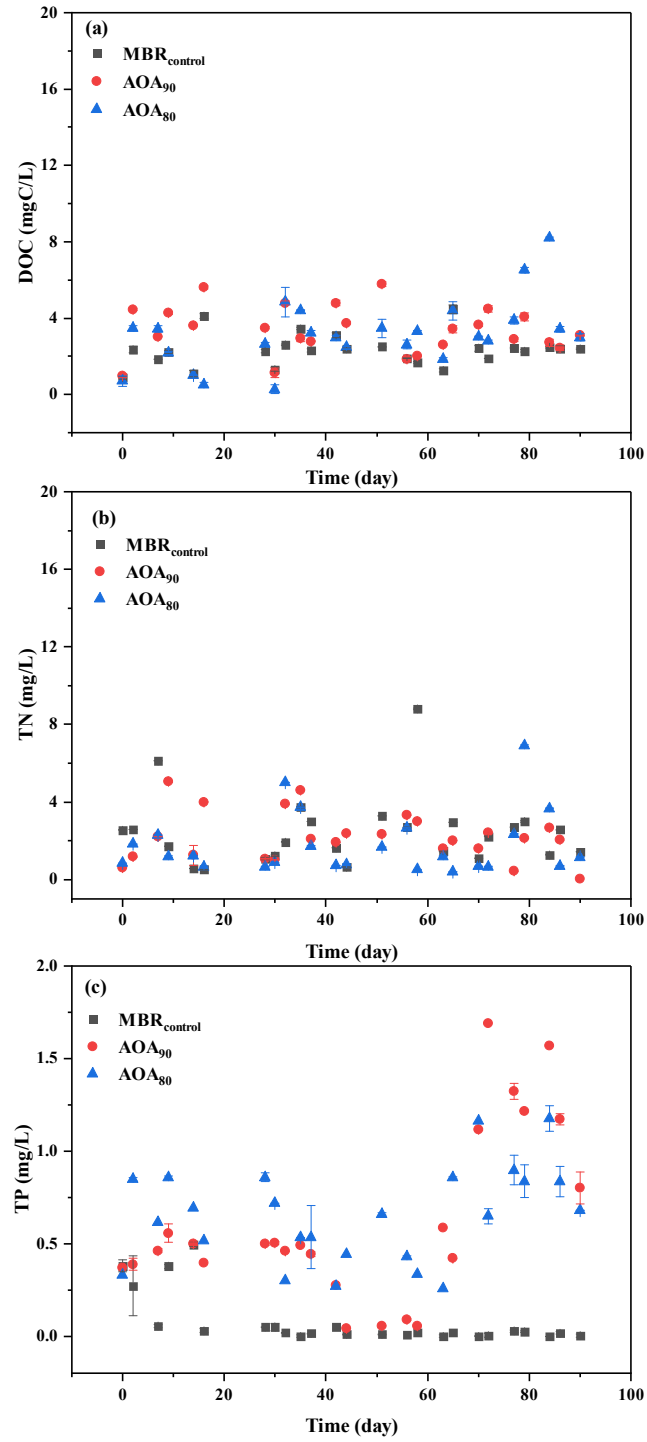

**Figure S1.** The temporal variations in basic quality parameters (DOC, TN, and TP) in effluents from MBRs (MBR<sub>control</sub>, AOA<sub>90</sub>, and AOA<sub>80</sub>).

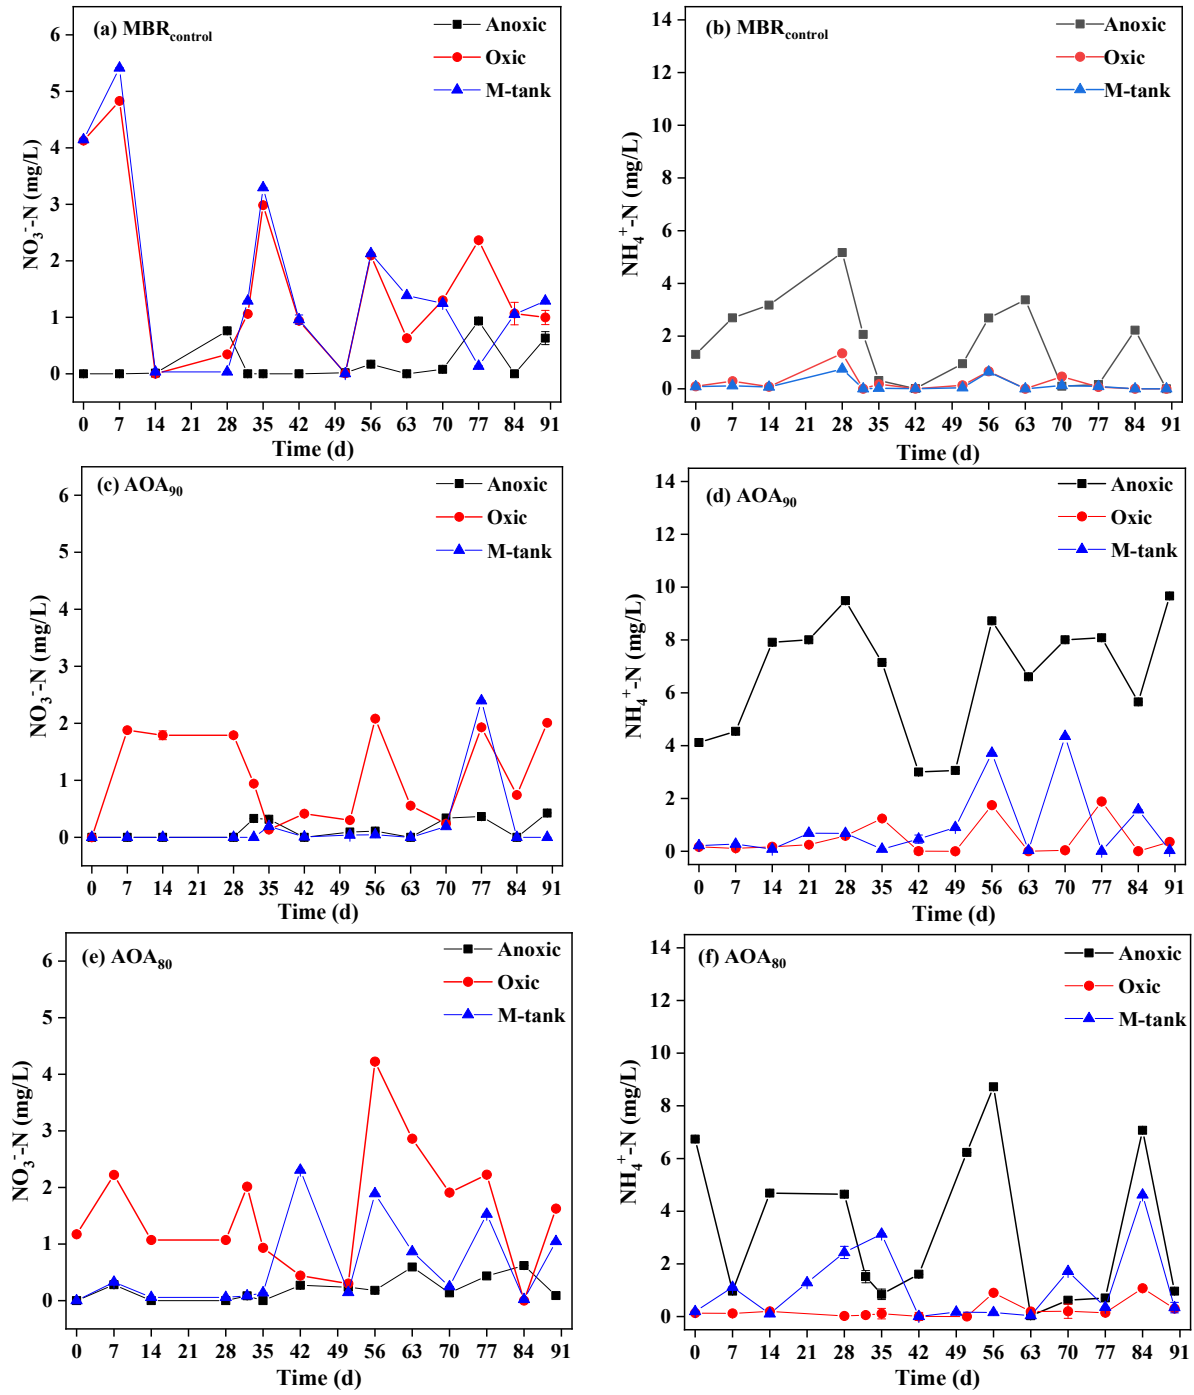

**Figure S2.** The temporal variations of  $\text{NO}_3^-$ -N and  $\text{NH}_4^+$ -N in different tanks of  $\text{MBR}_{\text{control}}$ ,  $\text{AOA}_{90}$ , and  $\text{AOA}_{80}$ .

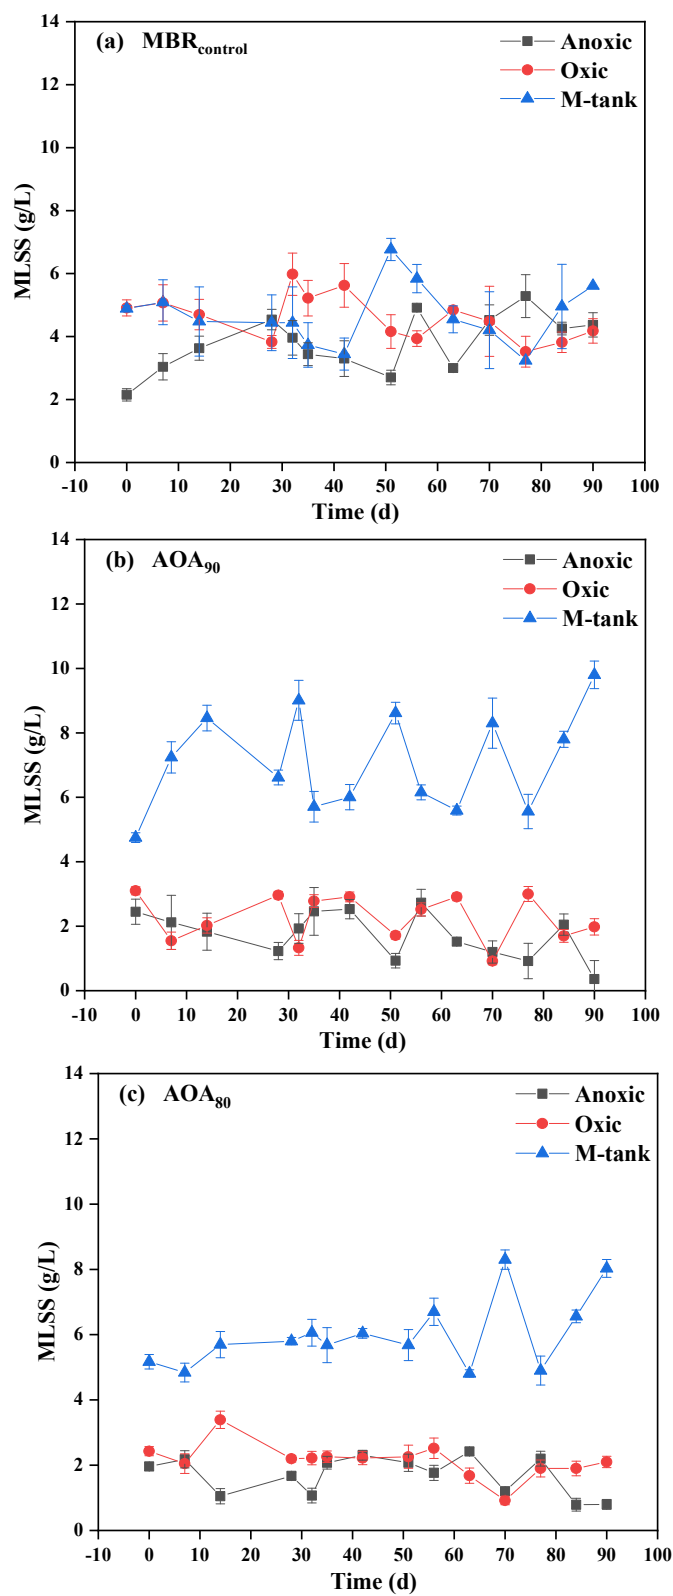

**Figure S3.** The MLSS concentration in different units of MBR<sub>control</sub> (a), AOA<sub>90</sub> (b), and AOA<sub>80</sub> (c).



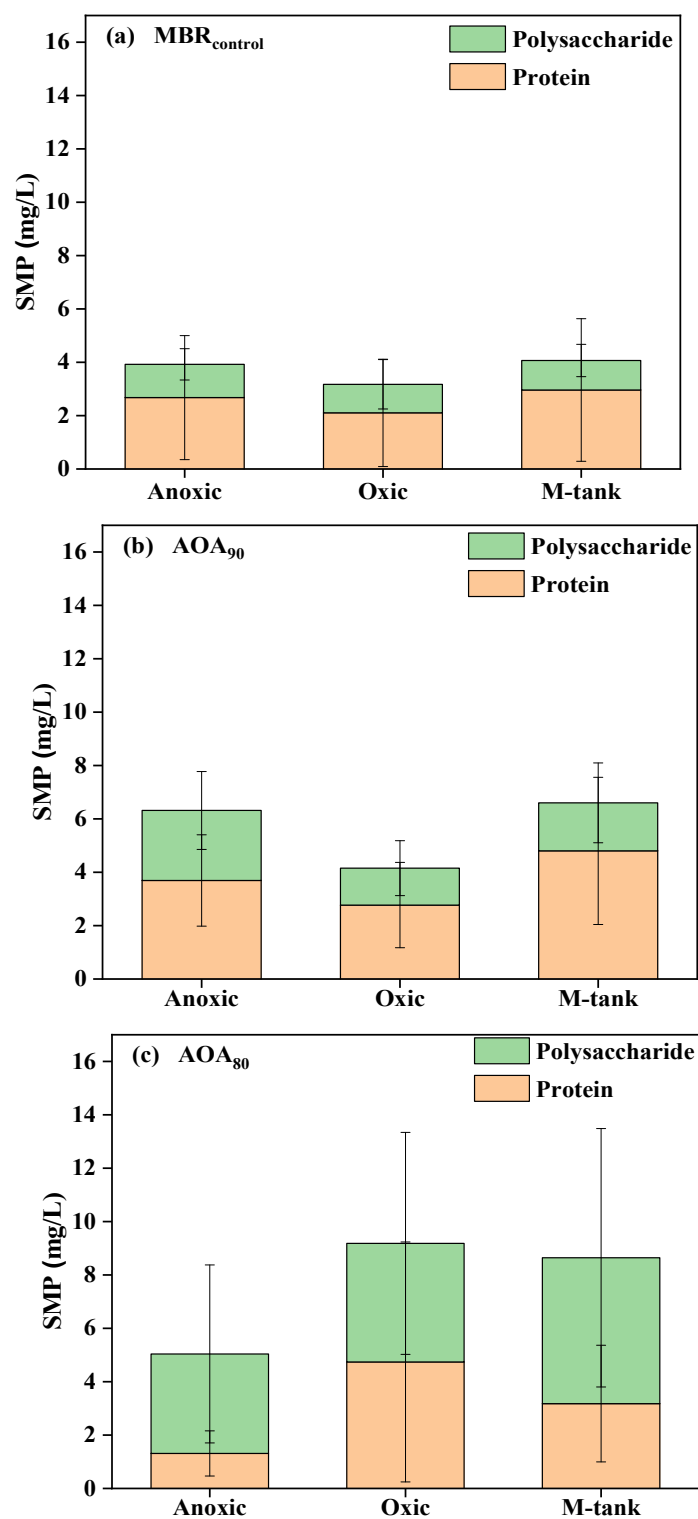

**Figure S4.** The average polysaccharide and protein in SMP in different units of MBR<sub>control</sub> (a and b), AOA<sub>90</sub> (c and d), and AOA<sub>80</sub> (e and f).

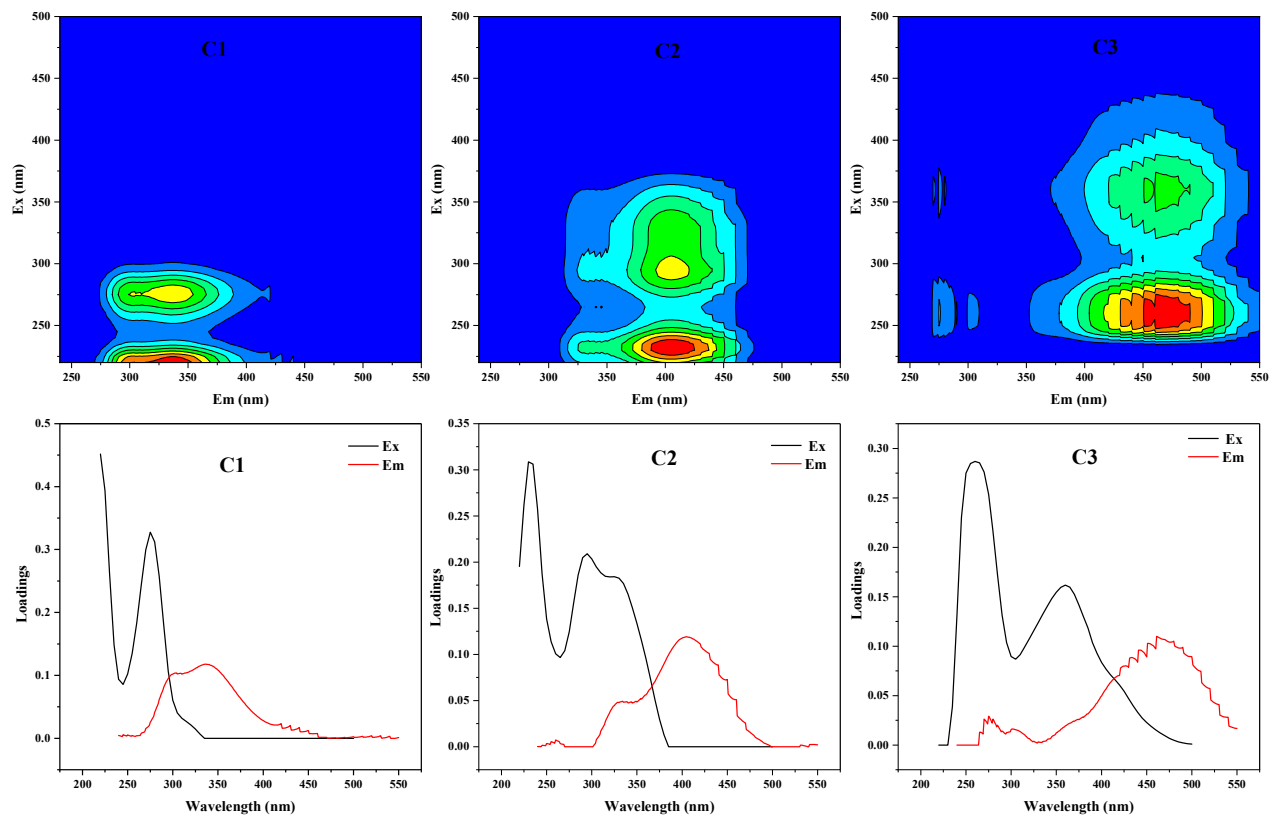

**Figure S5.** EEM-PARAFAC components, tryptophan-like (C1), fulvic-like (C2), and humic-like (C3).

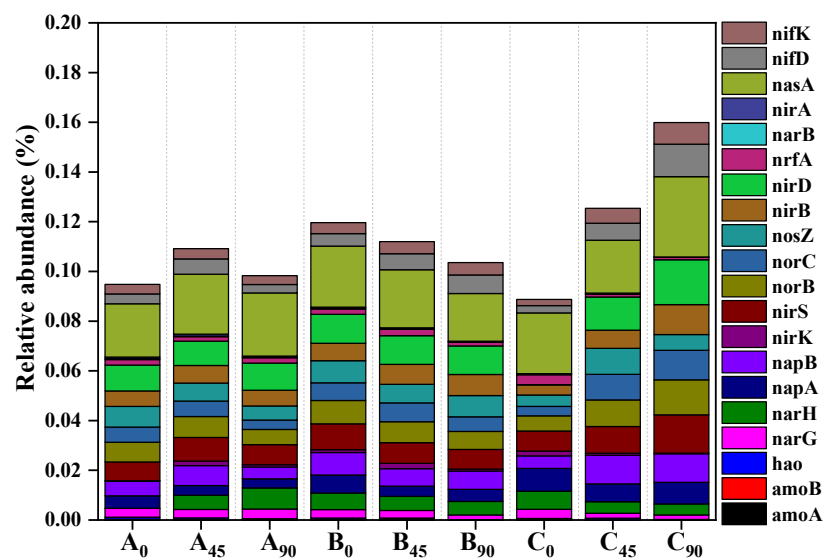

**Figure S6.** The relative abundance of functional genes responsible for nitrogen metabolism in MBR<sub>control</sub> (A), AOA<sub>90</sub> (B), and AOA<sub>80</sub> (C). (The subscript of A, B, and C means the sampling time.)
